# Supplementary material
Source: Research Square preprint supplement (doi:10.21203/rs.3.rs-9563504/v1)
Supplement: Supplementary file 1 [file 35d4f8820d39d74a80b75094.docx]

**Supplementary Material - ‘The emotional state of organic dairy cows appears not to be affected differently by a high- versus low-input diet’**

Supplementary Table S1. Scores for stress level of tested animals during the JBT and the OFT. The animal's behavior during training / testing for the JBT and the OFT is continuously observed. If more than one category has a score of 2, the JBT or the OFT is terminated for that day. If there is a score of 1 in more than 2 categories, the trial is completed, but a longer break (approx. 30 min) is provided before the next trial starts. If the animal still shows a constant or increased score after this recovery break, the training / testing for the JBT or the OFT is terminated on that day.

| **Score** | **Definition** |
| --- | --- |
| Locomotion | |
| 0 | Slow locomotion at walk |
| 1 | Fast locomotion, at trot or canter with breaks in between |
| 2 | Fast locomotion at trot or canter, no pauses within 3 min, partly stereotypical running up and down |
| Self-directed behavior | |
| 0 | No scratching/nibbling of the body with mouth or hooves |
| 1 | Brief scratching/nibbling of the body with mouth or hooves (≤ 2x per min) |
| 2 | Repeated scratching/nibbling |
| Vocalization | |
| 0 | No vocalization |
| 1 | Short vocalization (max. 1 sound per min) |
| 2 | Frequent vocalization (> 1 sound per min) |
| Aggression | |
| 0 | No aggression |
| 1 | Brief aggression (hitting the experimenter or animal from own group with head; max. 3 agonistic interactions per min) |
| 2 | Persistent aggression (repeated agonistic behavior towards experimenter or animals from own group; > 3 agonistic interactions per min) |
| Fearfulness | |
| 0 | No fear behavior visible |
| 1 | Moderate behavior of fear (immobility > 30 s in total, 2x defecation or micturition) |
| 2 | Severe behavior of fear (immobility > 60 s in total, escape attempts, ≥ 3x defecation or micturition) |

Supplementary Table S2. Kaplan-Meier survival estimates showing number of cows at risk, number of go responses, survival rate, 95% confidence interval, and SE for each cue type (P, Ap, A, An, N) and test session (T1, T5) of HI and LI cows. During JBT, P and N cues were presented twice per cow and test session resulting in a higher number of cows at risk at starting time point.

| **P, T1** | | | | | | | | | | |
| --- | --- | --- | --- | --- | --- | --- | --- | --- | --- | --- |
| **Time (s)** | **HI (n = 22, two P trials per cow)** | | | | | **LI (n = 28, two P trials per cow)** | | | | |
| **No. at risk** | **No. of Go-responses** | **Survival rate** | **CI 95%** | **SE** | **No. at risk** | **No. of Go-responses** | **Survival rate** | **CI 95%** | **SE** |
| 0 | 22 | 0 | 1.00 | 1.00, 1.00 | 0.00 | 28 | 0 | 1.00 | 1.00, 1.00 | 0.00 |
| 20 | 9 | 13 | 0.41 | 0.25, 0.68 | 0.11 | 11 | 17 | 0.39 | 0.25, 0.62 | 0.09 |
| 40 | 7 | 2 | 0.32 | 0.17, 0.59 | 0.10 | 9 | 2 | 0.32 | 0.19, 0.55 | 0.09 |
| 60 | 5 | 2 | 0.23 | 0.11, 0.49 | 0.09 | 5 | 4 | 0.18 | 0.08, 0.40 | 0.07 |
| 80 | 3 | 2 | 0.14 | 0.05, 0.39 | 0.07 | 4 | 1 | 0.14 | 0.06, 0.35 | 0.07 |
| 90 | 3 | 0 | 0.14 | 0.05, 0.39 | 0.07 | 4 | 0 | 0.14 | 0.06, 0.35 | 0.07 |
| **P, T5** | | | | | | | | | | |
| **Time (s)** | **HI (n = 26, two P trials per cow)** | | | | | **LI (n = 26, two P trials per cow)** | | | | |
| **No. at risk** | **No. of Go-responses** | **Survival rate** | **CI 95%** | **SE** | **No. at risk** | **No. of Go-responses** | **Survival rate** | **CI 95%** | **SE** |
| 0 | 26 | 0 | 1.00 | 1.00, 1.00 | 0.00 | 26 | 0 | 1.00 | 1.00, 1.00 | 0.00 |
| 20 | 9 | 17 | 0.35 | 0.20, 0.59 | 0.09 | 7 | 19 | 0.27 | 0.14, 0.51 | 0.09 |
| 40 | 5 | 4 | 0.19 | 0.09, 0.42 | 0.08 | 4 | 3 | 0.15 | 0.06, 0.38 | 0.07 |
| 60 | 3 | 2 | 0.12 | 0.04, 0.33 | 0.06 | 3 | 1 | 0.12 | 0.04, 0.33 | 0.06 |
| 80 | 3 | 0 | 0.12 | 0.04, 0.33 | 0.06 | 2 | 1 | 0.08 | 0.02, 0.29 | 0.05 |
| 90 | 3 | 0 | 0.12 | 0.04, 0.33 | 0.06 | 2 | 0 | 0.08 | 0.02, 0.29 | 0.05 |
| **Ap, T1** | | | | | | | | | | |
| **Time (s)** | **HI (n = 11)** | | | | | **LI (n = 14)** | | | | |
| **No. at risk** | **No. of Go-responses** | **Survival rate** | **CI 95%** | **SE** | **No. at risk** | **No. of Go-responses** | **Survival rate** | **CI 95%** | **SE** |
| 0 | 11 | 0 | 1.00 | 1.00, 1.00 | 0.00 | 14 | 0 | 1.00 | 1.00, 1.00 | 0.00 |
| 20 | 9 | 2 | 0.82 | 0.62, 1.00 | 0.12 | 9 | 5 | 0.64 | 0.44, 0.95 | 0.13 |
| 40 | 9 | 0 | 0.82 | 0.62, 1.00 | 0.12 | 8 | 1 | 0.57 | 0.36,  0.90 | 0.13 |
| 60 | 7 | 2 | 0.64 | 0.41, 0.99 | 0.15 | 7 | 1 | 0.50 | 0.30,  0.84 | 0.13 |
| 80 | 7 | 0 | 0.64 | 0.41, 0.99 | 0.15 | 7 | 0 | 0.50 | 0.30,  0.84 | 0.13 |
| 90 | 7 | 0 | 0.64 | 0.41, 0.99 | 0.15 | 7 | 0 | 0.50 | 0.30,  0.84 | 0.13 |
| **Ap, T5** | | | | | | | | | | |
| **Time (s)** | **HI (n = 13)** | | | | | **LI (n = 13)** | | | | |
| **No. at risk** | **No. of Go-responses** | **Survival rate** | **CI 95%** | **SE** | **No. at risk** | **No. of Go-responses** | **Survival rate** | **CI 95%** | **SE** |
| 0 | 13 | 0 | 1.00 | 1.00, 1.00 | 0.00 | 13 | 0 | 1.00 | 1.00, 1,00 | 0.00 |
| 20 | 8 | 5 | 0.62 | 0.40, 0.95 | 0.13 | 7 | 6 | 0.54 | 0.33, 0,89 | 0.14 |
| 40 | 8 | 0 | 0.62 | 0.40, 0.95 | 0.13 | 5 | 2 | 0.38 | 0.19, 0,76 | 0.13 |
| 60 | 7 | 1 | 0.54 | 0.33, 0.89 | 0.14 | 4 | 1 | 0.31 | 0.14, 0,70 | 0.13 |
| 80 | 7 | 0 | 0.54 | 0.33, 0.89 | 0.14 | 4 | 0 | 0.31 | 0.14, 0,70 | 0.13 |
| 90 | 7 | 1 | 0.46 | 0.26, 0.83 | 0.14 | 4 | 0 | 0.31 | 0.14, 0,70 | 0.13 |
| **A, T1** | | | | | | | | | | |
| **Time (s)** | **HI (n = 11)** | | | | | **LI (n = 14)** | | | | |
| **No. at risk** | **No. of Go-responses** | **Survival rate** | **CI 95%** | **SE** | **No. at risk** | **No. of Go-responses** | **Survival rate** | **CI 95%** | **SE** |
| 0 | 11 | 0 | 1.00 | 1.00, 1.00 | 0.00 | 14 | 0 | 1.00 | 1.00, 1.00 | 0.00 |
| 20 | 11 | 0 | 1.00 | 1.00, 1.00 | 0.00 | 13 | 1 | 0.93 | 0.80, 1.00 | 0.07 |
| 40 | 11 | 0 | 1.00 | 1.00, 1.00 | 0.00 | 11 | 2 | 0.79 | 0.60, 1.00 | 0.11 |
| 60 | 10 | 1 | 0.91 | 0.75, 1.00 | 0.09 | 10 | 1 | 0.71 | 0.51, 0.99 | 0.12 |
| 80 | 9 | 1 | 0.82 | 0.62, 1.00 | 0.12 | 10 | 0 | 0.71 | 0.51, 0.99 | 0.12 |
| 90 | 8 | 1 | 0.73 | 0.51, 1.00 | 0.13 | 10 | 0 | 0.71 | 0.51, 0.99 | 0.12 |
| **A, T5** | | | | | | | | | | |
| **Time (s)** | **HI (n = 13)** | | | | | **LI (n = 13)** | | | | |
| **No. at risk** | **No. of Go-responses** | **Survival rate** | **CI 95%** | **SE** | **No. at risk** | **No. of Go-responses** | **Survival rate** | **CI 95%** | **SE** |
| 0 | 13 | 0 | 1.00 | 1.00, 1.00 | 0.00 | 13 | 0 | 1.00 | 1.00, 1.00 | 0.00 |
| 20 | 10 | 3 | 0.77 | 0.57, 1.00 | 0.12 | 7 | 6 | 0.54 | 0.33, 0.89 | 0.14 |
| 40 | 8 | 2 | 0.62 | 0.40, 0.95 | 0.13 | 6 | 1 | 0.46 | 0.26, 0.83 | 0.14 |
| 60 | 8 | 0 | 0.62 | 0.40, 0.95 | 0.13 | 6 | 0 | 0.46 | 0.26, 0.83 | 0.14 |
| 80 | 8 | 0 | 0.62 | 0.40, 0.95 | 0.13 | 6 | 0 | 0.46 | 0.26, 0.83 | 0.14 |
| 90 | 8 | 0 | 0.62 | 0.40, 0.95 | 0.13 | 6 | 0 | 0.46 | 0.26, 0.83 | 0.14 |
| **An, T1** | | | | | | | | | | |
| **Time (s)** | **HI (n = 11)** | | | | | **LI (n = 14)** | | | | |
| **No. at risk** | **No. of Go-responses** | **Survival rate** | **CI 95%** | **SE** | **No. at risk** | **No. of Go-responses** | **Survival rate** | **CI 95%** | **SE** |
| 0 | 11 | 0 | 1.00 | 1.00, 1.00 | 0.00 | 14 | 0 | 1.00 | 1.00, 1.00 | 0.00 |
| 20 | 10 | 1 | 0.91 | 0.75, 1.00 | 0.09 | 14 | 0 | 1.00 | 1.00, 1.00 | 0.00 |
| 40 | 10 | 0 | 0.91 | 0.75, 1.00 | 0.09 | 14 | 0 | 1.00 | 1.00, 1.00 | 0.00 |
| 60 | 10 | 0 | 0.91 | 0.75, 1.00 | 0.09 | 14 | 0 | 1.00 | 1.00, 1.00 | 0.00 |
| 80 | 9 | 1 | 0.82 | 0.62, 1.00 | 0.12 | 14 | 0 | 1.00 | 1.00, 1.00 | 0.00 |
| 90 | 9 | 0 | 0.82 | 0.62, 1.00 | 0.12 | 14 | 0 | 1.00 | 1.00, 1.00 | 0.00 |
| **An, T5** | | | | | | | | | | |
| **Time (s)** | **HI (n = 13)** | | | | | **LI (n = 13)** | | | | |
| **No. at risk** | **No. of Go-responses** | **Survival rate** | **CI 95%** | **SE** | **No. at risk** | **No. of Go-responses** | **Survival rate** | **CI 95%** | **SE** |
| 0 | 13 | 0 | 1.00 | 1.00, 1.00 | 0.00 | 13 | 0 | 1.00 | 1.00, 1.00 | 0.00 |
| 20 | 9 | 4 | 0.69 | 0.48, 0.99 | 0.13 | 12 | 1 | 0.92 | 0.79, 1.00 | 0.07 |
| 40 | 9 | 0 | 0.69 | 0.48, 0.99 | 0.13 | 10 | 2 | 0.77 | 0.57, 1.00 | 0.12 |
| 60 | 9 | 0 | 0.69 | 0.48, 0.99 | 0.13 | 10 | 0 | 0.77 | 0.57, 1.00 | 0.12 |
| 80 | 8 | 1 | 0.62 | 0.40, 0.95 | 0.13 | 10 | 0 | 0.77 | 0.57, 1.00 | 0.12 |
| 90 | 8 | 0 | 0.62 | 0.40, 0.95 | 0.13 | 10 | 0 | 0.77 | 0.57, 1.00 | 0.12 |
| **N, T1** | | | | | | | | | | |
| **Time (s)** | **HI (n = 22, two N trials per cow)** | | | | | **LI (n = 28, two N trials per cow)** | | | | |
| **No. at risk** | **No. of Go-responses** | **Survival rate** | **CI 95%** | **SE** | **No. at risk** | **No. of Go-responses** | **Survival rate** | **CI 95%** | **SE** |
| 0 | 22 | 0 | 1.00 | 1.00, 1.00 | 0.00 | 28 | 0 | 1.00 | 1.00, 1.00 | 0.00 |
| 20 | 22 | 0 | 1.00 | 1.00, 1.00 | 0.00 | 27 | 1 | 0.96 | 0.90, 1.00 | 0.04 |
| 40 | 20 | 2 | 0.91 | 0.80, 1.00 | 0.06 | 26 | 1 | 0.93 | 0.84, 1.00 | 0.05 |
| 60 | 20 | 0 | 0.91 | 0.80, 1.00 | 0.06 | 26 | 0 | 0.93 | 0.84, 1.00 | 0.05 |
| 80 | 20 | 0 | 0.91 | 0.80, 1.00 | 0.06 | 26 | 0 | 0.93 | 0.84, 1.00 | 0.05 |
| 90 | 20 | 0 | 0.91 | 0.80, 1.00 | 0.06 | 26 | 0 | 0.93 | 0.84, 1.00 | 0.05 |
| **N, T5** | | | | | | | | | | |
| **Time (s)** | **HI (n = 26, two N trials per cow)** | | | | | **LI (n = 26, two N trials per cow)** | | | | |
| **No. at risk** | **No. of Go-responses** | **Survival rate** | **CI 95%** | **SE** | **No. at risk** | **No. of Go-responses** | **Survival rate** | **CI 95%** | **SE** |
| 0 | 26 | 0 | 1.00 | 1.00, 1.00 | 0.00 | 26 | 0 | 1.00 | 1.00, 1.00 | 0.00 |
| 20 | 25 | 1 | 0.96 | 0.89, 1.00 | 0.04 | 26 | 0 | 1.00 | 1.00, 1.00 | 0.00 |
| 40 | 25 | 0 | 0.96 | 0.89, 1.00 | 0.04 | 25 | 1 | 0.96 | 0.89, 1.00 | 0.04 |
| 60 | 23 | 2 | 0.88 | 0.77, 1.00 | 0.06 | 24 | 1 | 0.92 | 0.83, 1.00 | 0.05 |
| 80 | 23 | 0 | 0.88 | 0.77, 1.00 | 0.06 | 23 | 1 | 0.88 | 0.77, 1.00 | 0.06 |
| 90 | 23 | 0 | 0.88 | 0.77, 1.00 | 0.06 | 23 | 0 | 0.88 | 0.77, 1.00 | 0.06 |
